# Supplementary material for: High-throughput Treg cell receptor sequencing reveals the relationship between disease activity and immunosenescence in patients with rheumatoid arthritis
Source: Research Square preprint supplement (doi:10.21203/rs.3.rs-7953908/v1), 2025-11-13
Supplement: Supplementary file 1 [file 1c4b64d97b82e7abf220e3ec.docx]

**Supplement Table 3：Analysis of VDJ Fraction difference in Total Clone comparison Group**

| Gene | Non-AD-01 | Non-AD-02 | Non-AD-03 | Non-AD-04 | AD-01 | AD-02 | AD-03 | AD-04 | P -value |
| --- | --- | --- | --- | --- | --- | --- | --- | --- | --- |
| TRBV10-3|TRBD1|TRBJ2-5 | 0.0931 | 0 | 0 | 0 | 02005 | 0.2445 | 0.103 | 0.3331 | 0.02 |
| TRBV11-2|TRBD2|TRBJ2-7 | 0.0931 | 0.1412 | 0.1629 | 0 | 0.4001 | 0.7946 | 0.206 | 0.3331 | 0.02 |
| TRBV29-1|TRBD2|TRBJ2-2 | 0 | 0.1412 | 0 | 0 | 0.2005 | 0.4279 | 0.8239 | 0.3331 | 0.02 |
| TRBV9|TRBD1|TRBJ2-1 | 0 | 0 | 0 | 0 | 0.1337 | 0.0611 | 0.206 | 0.3331 | 0.02 |
