# Supplementary material for: High-throughput Treg cell receptor sequencing reveals the relationship between disease activity and immunosenescence in patients with rheumatoid arthritis
Source: Research Square preprint supplement (doi:10.21203/rs.3.rs-7953908/v1), 2025-11-13
Supplement: Supplementary file 2 [file 87ef620122682b0cfe5a5f51.docx]

**Supplement Table 2：Analysis of VJFraction difference in Total Clone comparison Group**

| Gene | Non-AD-01 | Non-AD-02 | Non-AD-03 | Non-AD-04 | AD-01 | AD-02 | AD-03 | AD-04 | Pvalue |
| --- | --- | --- | --- | --- | --- | --- | --- | --- | --- |
| TRBV11-2|TRBJ2-7 | 0.2793 | 0.2825 | 0.2443 | 0 | 0.4011 | 0.978 | 0.309 | 0.6663 | 0.02 |
| TRBV20/OR9-2|TRBJ2-1 | 0 | 0.3531 | 0.0814 | 0 | 0.1337 | 1.1002 | 0.4119 | 0.6663 | 0.04 |
| TRBV27|TRBJ2-2 | 0 | 0.0706 | 0.0814 | 0.236 | 0.2674 | 0.1222 | 0.309 | 0.3331 | 0.04 |
| TRBV29-1|TRBJ2-2 | 0 | 0.1412 | 0.1629 | 0 | 0.2005 | 0.7335 | 0.8239 | 0.3331 | 0.02 |
