# Supplementary material for: High-throughput Treg cell receptor sequencing reveals the relationship between disease activity and immunosenescence in patients with rheumatoid arthritis
Source: Research Square preprint supplement (doi:10.21203/rs.3.rs-7953908/v1), 2025-11-13
Supplement: Supplementary file 3 [file f69ac335b9102eafdec8d388.docx]

**Supplement Table 1 Primer list**

| **FIRST STRAND cDNA SYNTHESIS** | |
| --- | --- |
| Switch_oligo | AAGCAGUGGTAUCAACGCAGAGUNNNNUNNNNUNNNNUCTT(rG)4 |
| BC1R | CAGTATCTGGAGTCATTGA |
| **FIRST PCR AMPLIFICATION** | |
| Smart20 | AAGCAGTGGTATCAACGCA |
| BC2R | ATTGGGCAGCCCTGATTACACSTTKTTCAGGTCCTC |
| **SECOND PCR AMPLIFICATION** | |
| Step_1 | (N)4–6(XXXXX)CAGTGGTATCAACGCAGAG |
| Hum bcj | (N)4-6(XXXXX)ATTGGGCAGCCCTGATT |
